# Supplementary material
Source: MDPI journal article supplement (https://www.mdpi.com/1996-1944/13/10/2370)

# checkCIF/PLATON report

Structure factors have been supplied for datablock(s) I

THIS REPORT IS FOR GUIDANCE ONLY. IF USED AS PART OF A REVIEW PROCEDURE FOR PUBLICATION, IT SHOULD NOT REPLACE THE EXPERTISE OF AN EXPERIENCED CRYSTALLOGRAPHIC REFEREE.

No syntax errors found.      CIF dictionary      Interpreting this report

## Datablock: I

---

Bond precision:    C-C = 0.0077 Å                      Wavelength=0.71073

Cell:                      a=8.7426(6)              b=14.3293(12)              c=14.1011(9)  
                                alpha=90              beta=96.923(6)              gamma=90

Temperature:              295 K

|                | Calculated          | Reported            |
|----------------|---------------------|---------------------|
| Volume         | 1753.6(2)           | 1753.6(2)           |
| Space group    | P 21/n              | P 21/n              |
| Hall group     | -P 2yn              | -P 2yn              |
| Moiety formula | C13 H19 Br Co N5 O4 | C13 H19 Br Co N5 O4 |
| Sum formula    | C13 H19 Br Co N5 O4 | C13 H19 Br Co N5 O4 |
| Mr             | 448.16              | 448.17              |
| Dx,g cm-3      | 1.697               | 1.698               |
| Z              | 4                   | 4                   |
| Mu (mm-1)      | 3.285               | 3.284               |
| F000           | 904.0               | 904.0               |
| F000'          | 904.57              |                     |
| h,k,lmax       | 11,18,18            | 11,18,17            |
| Nref           | 3824                | 3776                |
| Tmin,Tmax      | 0.249,0.440         | 0.439,1.000         |
| Tmin'          | 0.209               |                     |

Correction method= # Reported T Limits: Tmin=0.439 Tmax=1.000  
AbsCorr = MULTI-SCAN

Data completeness= 0.987                      Theta(max)= 26.998

R(reflections)= 0.0494( 2007)              wR2(reflections)= 0.1077( 3776)

S = 0.888                      Npar= 221

---



The following ALERTS were generated. Each ALERT has the format

**test-name\_ALERT\_alert-type\_alert-level.**

Click on the hyperlinks for more details of the test.

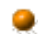

#### **Alert level B**

PLAT910\_ALERT\_3\_B Missing # of FCF Reflection(s) Below Theta(Min).

11 Note

**Author Response: These reflections either have masked by the beamstop or have too high intensity (overflow), hence they have not been measured.**

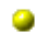

#### **Alert level C**

|                                                                   |              |
|-------------------------------------------------------------------|--------------|
| PLAT230_ALERT_2_C Hirshfeld Test Diff for O3 --N3 .               | 7.0 s.u.     |
| PLAT341_ALERT_3_C Low Bond Precision on C-C Bonds .....           | 0.0077 Ang.  |
| PLAT906_ALERT_3_C Large K Value in the Analysis of Variance ..... | 20.257 Check |
| PLAT906_ALERT_3_C Large K Value in the Analysis of Variance ..... | 3.951 Check  |
| PLAT906_ALERT_3_C Large K Value in the Analysis of Variance ..... | 2.209 Check  |
| PLAT911_ALERT_3_C Missing FCF Refl Between Thmin & STh/L= 0.600   | 21 Report    |

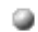

#### **Alert level G**

|                                                                    |             |
|--------------------------------------------------------------------|-------------|
| PLAT007_ALERT_5_G Number of Unrefined Donor-H Atoms .....          | 2 Report    |
| PLAT883_ALERT_1_G No Info/Value for _atom_sites_solution_primary . | Please Do ! |
| PLAT912_ALERT_4_G Missing # of FCF Reflections Above STh/L= 0.600  | 16 Note     |
| PLAT933_ALERT_2_G Number of OMIT Records in Embedded .res File ... | 3 Note      |
| PLAT941_ALERT_3_G Average HKL Measurement Multiplicity .....       | 2.2 Low     |
| PLAT978_ALERT_2_G Number C-C Bonds with Positive Residual Density. | 0 Info      |

---

0 **ALERT level A** = Most likely a serious problem - resolve or explain  
1 **ALERT level B** = A potentially serious problem, consider carefully  
6 **ALERT level C** = Check. Ensure it is not caused by an omission or oversight  
6 **ALERT level G** = General information/check it is not something unexpected

1 ALERT type 1 CIF construction/syntax error, inconsistent or missing data  
3 ALERT type 2 Indicator that the structure model may be wrong or deficient  
7 ALERT type 3 Indicator that the structure quality may be low  
1 ALERT type 4 Improvement, methodology, query or suggestion  
1 ALERT type 5 Informative message, check

---



It is advisable to attempt to resolve as many as possible of the alerts in all categories. Often the minor alerts point to easily fixed oversights, errors and omissions in your CIF or refinement strategy, so attention to these fine details can be worthwhile. In order to resolve some of the more serious problems it may be necessary to carry out additional measurements or structure refinements. However, the purpose of your study may justify the reported deviations and the more serious of these should normally be commented upon in the discussion or experimental section of a paper or in the "special\_details" fields of the CIF. checkCIF was carefully designed to identify outliers and unusual parameters, but every test has its limitations and alerts that are not important in a particular case may appear. Conversely, the absence of alerts does not guarantee there are no aspects of the results needing attention. It is up to the individual to critically assess their own results and, if necessary, seek expert advice.

### **Publication of your CIF in IUCr journals**

A basic structural check has been run on your CIF. These basic checks will be run on all CIFs submitted for publication in IUCr journals (*Acta Crystallographica*, *Journal of Applied Crystallography*, *Journal of Synchrotron Radiation*); however, if you intend to submit to *Acta Crystallographica Section C* or *E* or *IUCrData*, you should make sure that full publication checks are run on the final version of your CIF prior to submission.

### **Publication of your CIF in other journals**

Please refer to the *Notes for Authors* of the relevant journal for any special instructions relating to CIF submission.



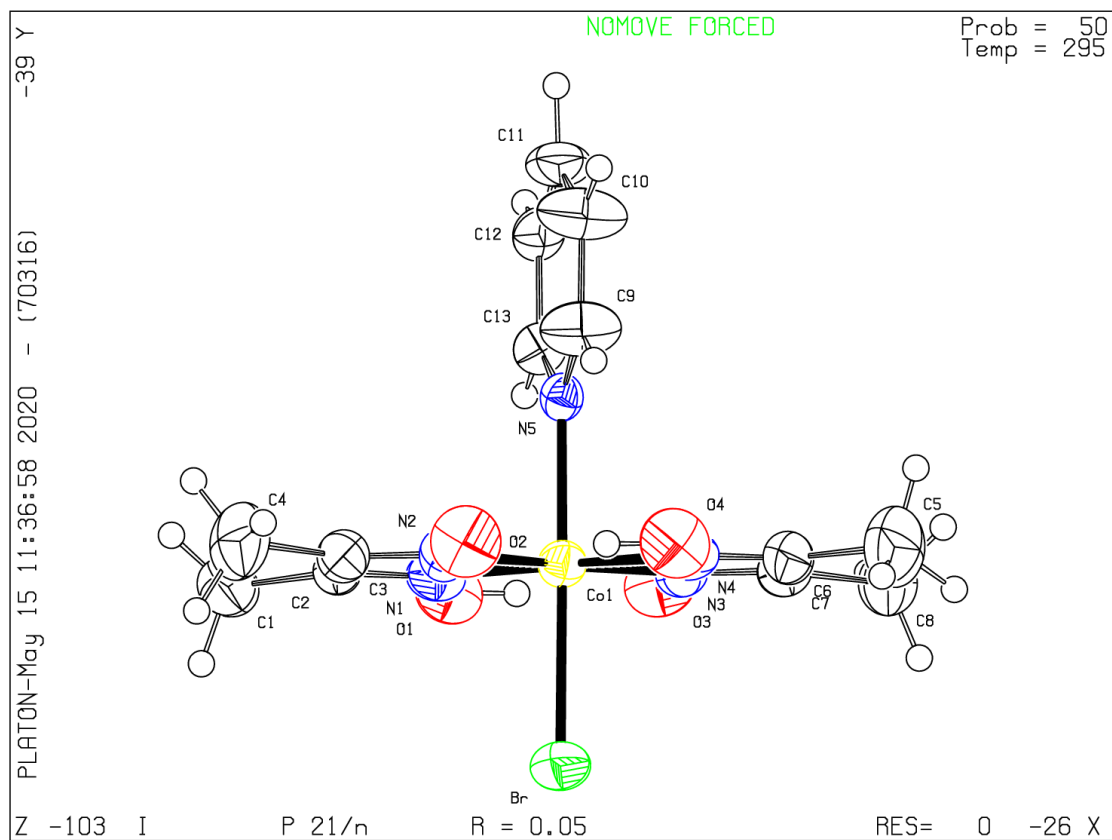



# checkCIF/PLATON report

Structure factors have been supplied for datablock(s) I12tfib

THIS REPORT IS FOR GUIDANCE ONLY. IF USED AS PART OF A REVIEW PROCEDURE FOR PUBLICATION, IT SHOULD NOT REPLACE THE EXPERTISE OF AN EXPERIENCED CRYSTALLOGRAPHIC REFEREE.

No syntax errors found.      CIF dictionary      Interpreting this report

## Datablock: I12tfib

---

Bond precision:    C-C = 0.0169 A                      Wavelength=0.71073

Cell:                      a=8.9048(5)              b=15.6550(5)              c=10.0166(5)  
                            alpha=90              beta=110.215(6)              gamma=90  
Temperature:              295 K

|                | Calculated                    | Reported                      |
|----------------|-------------------------------|-------------------------------|
| Volume         | 1310.35(12)                   | 1310.35(12)                   |
| Space group    | P 21                          | P 21                          |
| Hall group     | P 2yb                         | P 2yb                         |
| Moiety formula | C13 H19 Br Co N5 O4, C6 F4 I2 | C13 H19 Br Co N5 O4, C6 F4 I2 |
| Sum formula    | C19 H19 Br Co F4 I2 N5 O4     | C19 H19 Br Co F4 I2 N5 O4     |
| Mr             | 850.02                        | 850.03                        |
| Dx,g cm-3      | 2.154                         | 2.154                         |
| Z              | 2                             | 2                             |
| Mu (mm-1)      | 4.599                         | 4.599                         |
| F000           | 808.0                         | 808.0                         |
| F000'          | 806.63                        |                               |
| h,k,lmax       | 10,18,11                      | 10,18,11                      |
| Nref           | 4626[ 2405]                   | 4575                          |
| Tmin,Tmax      | 0.208,0.317                   | 0.454,1.000                   |
| Tmin'          | 0.160                         |                               |

Correction method= # Reported T Limits: Tmin=0.454 Tmax=1.000  
AbsCorr = MULTI-SCAN

Data completeness= 1.90/0.99                      Theta(max)= 24.996

R(reflections)= 0.0345( 3622)                      wR2(reflections)= 0.0732( 4575)

S = 0.896                      Npar= 329

---



The following ALERTS were generated. Each ALERT has the format

**test-name\_ALERT\_alert-type\_alert-level.**

Click on the hyperlinks for more details of the test.



#### Alert level B

PLAT910\_ALERT\_3\_B Missing # of FCF Reflection(s) Below Theta(Min).

11 Note

**Author Response: These reflections either have masked by the beamstop or have too high intensity (overflow), hence they have not been measured.**



#### Alert level C

|                                                                 |              |
|-----------------------------------------------------------------|--------------|
| PLAT090_ALERT_3_C Poor Data / Parameter Ratio (Zmax > 18) ..... | 7.27 Note    |
| PLAT334_ALERT_2_C Small Aver. Benzene C-C Dist C020 -C029       | 1.37 Ang.    |
| PLAT342_ALERT_3_C Low Bond Precision on C-C Bonds .....         | 0.01694 Ang. |
| PLAT911_ALERT_3_C Missing FCF Refl Between Thmin & STh/L= 0.595 | 3 Report     |



#### Alert level G

|                                                                    |             |
|--------------------------------------------------------------------|-------------|
| PLAT007_ALERT_5_G Number of Unrefined Donor-H Atoms .....          | 2 Report    |
| PLAT153_ALERT_1_G The s.u.'s on the Cell Axes are Equal ..(Note)   | 0.0005 Ang. |
| PLAT431_ALERT_2_G Short Inter HL..A Contact I002 ..03              | 3.13 Ang.   |
| 1-x,1/2+y,1-z =                                                    | 2_656 Check |
| PLAT434_ALERT_2_G Short Inter HL..HL Contact I001 ..Br03           | 3.44 Ang.   |
| 1+x,y,-1+z =                                                       | 1_654 Check |
| PLAT720_ALERT_4_G Number of Unusual/Non-Standard Labels .....      | 40 Note     |
| PLAT883_ALERT_1_G No Info/Value for _atom_sites_solution_primary . | Please Do ! |
| PLAT909_ALERT_3_G Percentage of I>2sig(I) Data at Theta(Max) Still | 48% Note    |
| PLAT941_ALERT_3_G Average HKL Measurement Multiplicity .....       | 3.8 Low     |
| PLAT978_ALERT_2_G Number C-C Bonds with Positive Residual Density. | 0 Info      |

---

0 **ALERT level A** = Most likely a serious problem - resolve or explain  
1 **ALERT level B** = A potentially serious problem, consider carefully  
4 **ALERT level C** = Check. Ensure it is not caused by an omission or oversight  
9 **ALERT level G** = General information/check it is not something unexpected

2 ALERT type 1 CIF construction/syntax error, inconsistent or missing data  
4 ALERT type 2 Indicator that the structure model may be wrong or deficient  
6 ALERT type 3 Indicator that the structure quality may be low  
1 ALERT type 4 Improvement, methodology, query or suggestion  
1 ALERT type 5 Informative message, check

---

---



It is advisable to attempt to resolve as many as possible of the alerts in all categories. Often the minor alerts point to easily fixed oversights, errors and omissions in your CIF or refinement strategy, so attention to these fine details can be worthwhile. In order to resolve some of the more serious problems it may be necessary to carry out additional measurements or structure refinements. However, the purpose of your study may justify the reported deviations and the more serious of these should normally be commented upon in the discussion or experimental section of a paper or in the "special\_details" fields of the CIF. checkCIF was carefully designed to identify outliers and unusual parameters, but every test has its limitations and alerts that are not important in a particular case may appear. Conversely, the absence of alerts does not guarantee there are no aspects of the results needing attention. It is up to the individual to critically assess their own results and, if necessary, seek expert advice.

### **Publication of your CIF in IUCr journals**

A basic structural check has been run on your CIF. These basic checks will be run on all CIFs submitted for publication in IUCr journals (*Acta Crystallographica*, *Journal of Applied Crystallography*, *Journal of Synchrotron Radiation*); however, if you intend to submit to *Acta Crystallographica Section C* or *E* or *IUCrData*, you should make sure that full publication checks are run on the final version of your CIF prior to submission.

### **Publication of your CIF in other journals**

Please refer to the *Notes for Authors* of the relevant journal for any special instructions relating to CIF submission.



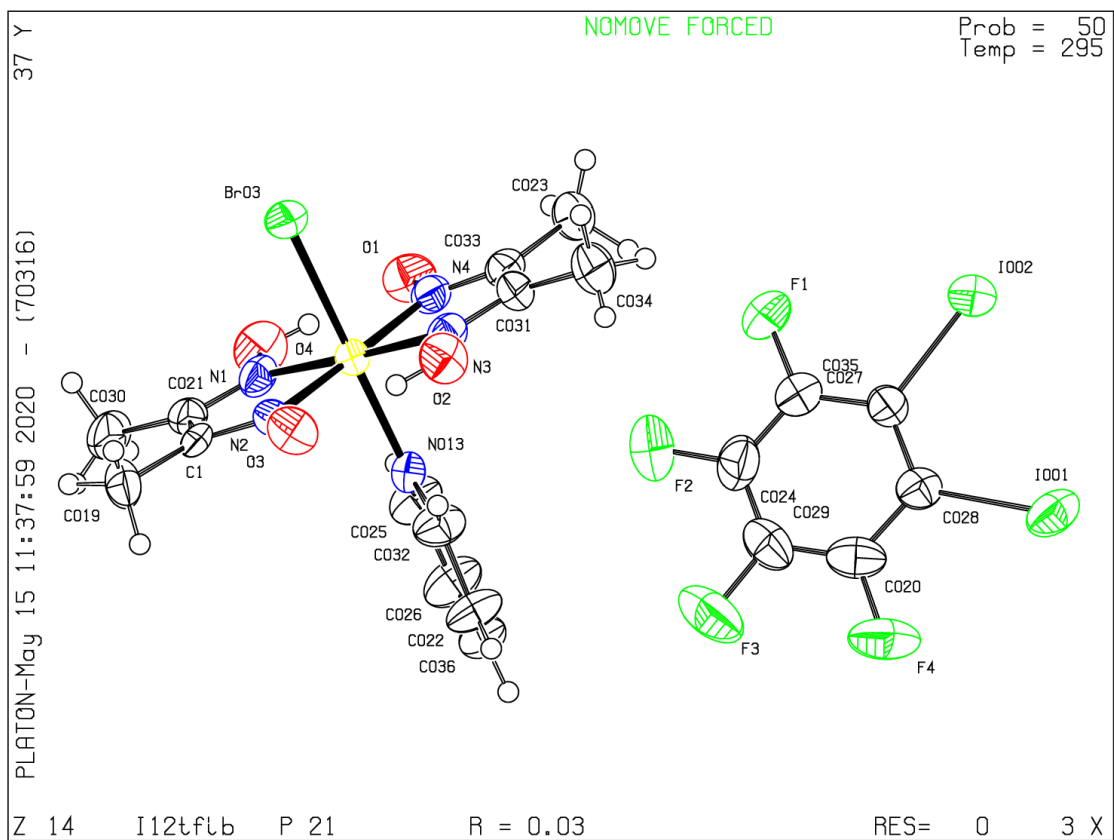



# checkCIF/PLATON report

Structure factors have been supplied for datablock(s) II

THIS REPORT IS FOR GUIDANCE ONLY. IF USED AS PART OF A REVIEW PROCEDURE FOR PUBLICATION, IT SHOULD NOT REPLACE THE EXPERTISE OF AN EXPERIENCED CRYSTALLOGRAPHIC REFEREE.

No syntax errors found.      CIF dictionary      Interpreting this report

## Datablock: II

---

Bond precision:    C-C = 0.0070 Å                      Wavelength=0.71073

Cell:                      a=8.7876(3)              b=14.8321(6)              c=13.9188(4)  
                                alpha=90              beta=94.610(3)              gamma=90

Temperature:              295 K

|                | Calculated          | Reported            |
|----------------|---------------------|---------------------|
| Volume         | 1808.29(11)         | 1808.29(11)         |
| Space group    | P n                 | P n                 |
| Hall group     | P -2yac             | P -2yac             |
| Moiety formula | C13 H19 Br Co N5 O5 | C13 H19 Br Co N5 O5 |
| Sum formula    | C13 H19 Br Co N5 O5 | C13 H19 Br Co N5 O5 |
| Mr             | 464.16              | 464.17              |
| Dx,g cm-3      | 1.705               | 1.705               |
| Z              | 4                   | 4                   |
| Mu (mm-1)      | 3.192               | 3.192               |
| F000           | 936.0               | 936.0               |
| F000'          | 936.61              |                     |
| h,k,lmax       | 10,17,16            | 10,17,16            |
| Nref           | 6383[ 3200]         | 6353                |
| Tmin,Tmax      | 0.281,0.384         | 0.370,1.000         |
| Tmin'          | 0.260               |                     |

Correction method= # Reported T Limits: Tmin=0.370 Tmax=1.000  
AbsCorr = MULTI-SCAN

Data completeness= 1.99/1.00                      Theta(max)= 24.999

R(reflections)= 0.0211( 5750)                      wR2(reflections)= 0.0473( 6353)

S = 0.930                                      Npar= 452

---



The following ALERTS were generated. Each ALERT has the format

**test-name\_ALERT\_alert-type\_alert-level.**

Click on the hyperlinks for more details of the test.



### Alert level B

|                   |                                                  |         |
|-------------------|--------------------------------------------------|---------|
| PLAT109_ALERT_2_B | Twinning Matrix is inverted Laue group operation | ? Check |
| PLAT910_ALERT_3_B | Missing # of FCF Reflection(s) Below Theta(Min). | 12 Note |

**Author Response: These reflections either have masked by the beamstop or have too high intensity (overflow), hence they have not been measured.**

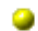

### Alert level C

|                   |                                               |              |
|-------------------|-----------------------------------------------|--------------|
| PLAT090_ALERT_3_C | Poor Data / Parameter Ratio (Zmax > 18) ..... | 7.05 Note    |
| PLAT341_ALERT_3_C | Low Bond Precision on C-C Bonds .....         | 0.00705 Ang. |
| PLAT413_ALERT_2_C | Short Inter XH3 .. XHn H8B ..H14B .           | 2.09 Ang.    |
|                   | -1/2+x,1-y,-1/2+z =                           | 2_464 Check  |

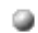

### Alert level G

|                   |                                                  |             |
|-------------------|--------------------------------------------------|-------------|
| PLAT007_ALERT_5_G | Number of Unrefined Donor-H Atoms .....          | 6 Report    |
| PLAT380_ALERT_4_G | Incorrectly? Oriented X(sp2)-Methyl Moiety ..... | C1 Check    |
| PLAT380_ALERT_4_G | Incorrectly? Oriented X(sp2)-Methyl Moiety ..... | C4 Check    |
| PLAT380_ALERT_4_G | Incorrectly? Oriented X(sp2)-Methyl Moiety ..... | C5 Check    |
| PLAT380_ALERT_4_G | Incorrectly? Oriented X(sp2)-Methyl Moiety ..... | C8 Check    |
| PLAT380_ALERT_4_G | Incorrectly? Oriented X(sp2)-Methyl Moiety ..... | C14 Check   |
| PLAT380_ALERT_4_G | Incorrectly? Oriented X(sp2)-Methyl Moiety ..... | C17 Check   |
| PLAT380_ALERT_4_G | Incorrectly? Oriented X(sp2)-Methyl Moiety ..... | C18 Check   |
| PLAT380_ALERT_4_G | Incorrectly? Oriented X(sp2)-Methyl Moiety ..... | C21 Check   |
| PLAT870_ALERT_4_G | ALERTS Related to Twinning Effects Suppressed .. | ! Info      |
| PLAT883_ALERT_1_G | No Info/Value for _atom_sites_solution_primary . | Please Do ! |
| PLAT909_ALERT_3_G | Percentage of I>2sig(I) Data at Theta(Max) Still | 74% Note    |
| PLAT913_ALERT_3_G | Missing # of Very Strong Reflections in FCF .... | 1 Note      |
| PLAT916_ALERT_2_G | Hooft y and Flack x Parameter Values Differ by . | 0.58 Check  |
| PLAT931_ALERT_5_G | CIFcalcFCF Twin Law ( 0 1 0) Est.d BASF          | 0.57 Check  |
| PLAT933_ALERT_2_G | Number of OMIT Records in Embedded .res File ... | 2 Note      |

0 **ALERT level A** = Most likely a serious problem - resolve or explain  
2 **ALERT level B** = A potentially serious problem, consider carefully  
3 **ALERT level C** = Check. Ensure it is not caused by an omission or oversight  
16 **ALERT level G** = General information/check it is not something unexpected

1 ALERT type 1 CIF construction/syntax error, inconsistent or missing data  
4 ALERT type 2 Indicator that the structure model may be wrong or deficient  
5 ALERT type 3 Indicator that the structure quality may be low  
9 ALERT type 4 Improvement, methodology, query or suggestion  
2 ALERT type 5 Informative message, check



It is advisable to attempt to resolve as many as possible of the alerts in all categories. Often the minor alerts point to easily fixed oversights, errors and omissions in your CIF or refinement strategy, so attention to these fine details can be worthwhile. In order to resolve some of the more serious problems it may be necessary to carry out additional measurements or structure refinements. However, the purpose of your study may justify the reported deviations and the more serious of these should normally be commented upon in the discussion or experimental section of a paper or in the "special\_details" fields of the CIF. checkCIF was carefully designed to identify outliers and unusual parameters, but every test has its limitations and alerts that are not important in a particular case may appear. Conversely, the absence of alerts does not guarantee there are no aspects of the results needing attention. It is up to the individual to critically assess their own results and, if necessary, seek expert advice.

### **Publication of your CIF in IUCr journals**

A basic structural check has been run on your CIF. These basic checks will be run on all CIFs submitted for publication in IUCr journals (*Acta Crystallographica*, *Journal of Applied Crystallography*, *Journal of Synchrotron Radiation*); however, if you intend to submit to *Acta Crystallographica Section C* or *E* or *IUCrData*, you should make sure that full publication checks are run on the final version of your CIF prior to submission.

### **Publication of your CIF in other journals**

Please refer to the *Notes for Authors* of the relevant journal for any special instructions relating to CIF submission.



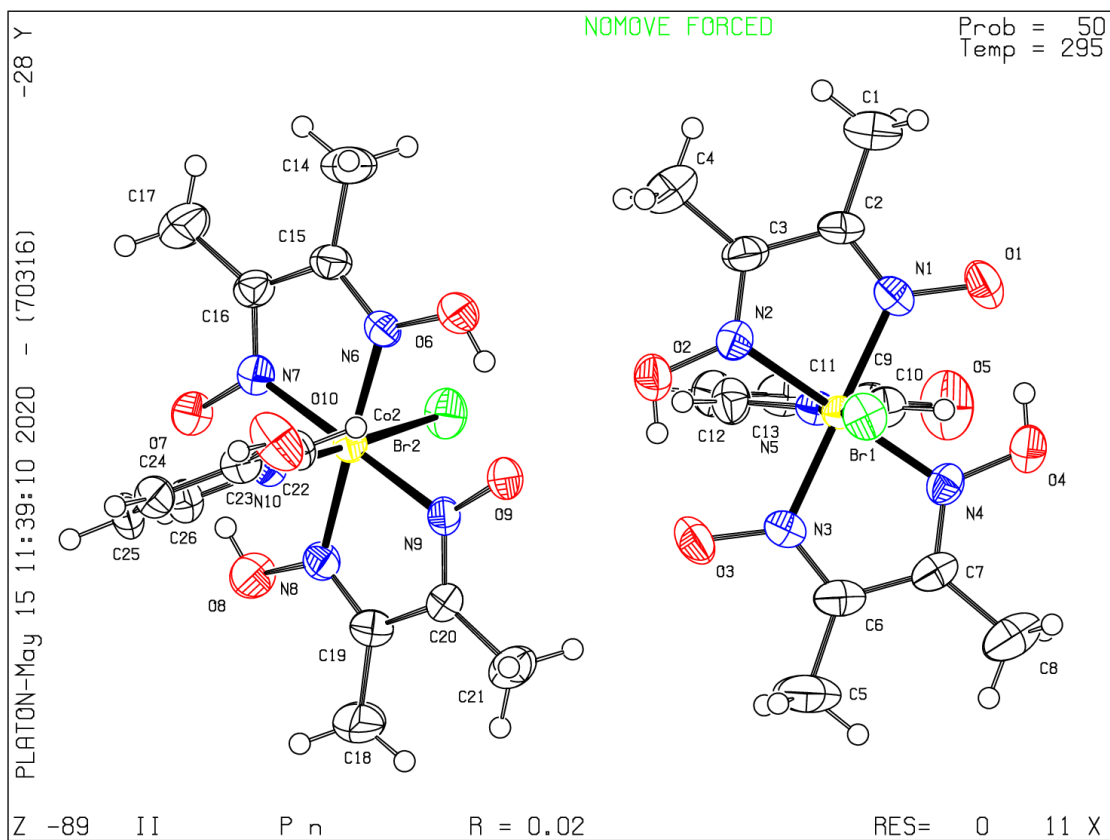



# checkCIF/PLATON report

Structure factors have been supplied for datablock(s) II14tfib

THIS REPORT IS FOR GUIDANCE ONLY. IF USED AS PART OF A REVIEW PROCEDURE FOR PUBLICATION, IT SHOULD NOT REPLACE THE EXPERTISE OF AN EXPERIENCED CRYSTALLOGRAPHIC REFEREE.

No syntax errors found.      CIF dictionary      Interpreting this report

## Datablock: II14tfib

---

|                 |                                       |                                       |
|-----------------|---------------------------------------|---------------------------------------|
| Bond precision: | C-C = 0.0105 A                        | Wavelength=0.71073                    |
| Cell:           | a=8.3528(8)                           | b=22.5657(18)      c=11.9617(8)       |
|                 | alpha=90                              | beta=91.460(7)      gamma=90          |
| Temperature:    | 295 K                                 |                                       |
|                 | Calculated                            | Reported                              |
| Volume          | 2253.9(3)                             | 2253.9(3)                             |
| Space group     | P 21/n                                | P 21/n                                |
| Hall group      | -P 2yn                                | -P 2yn                                |
| Moiety formula  | C13 H19 Br Co N5 O5,<br>0.5(C6 F4 I2) | C13 H19 Br Co N5 O5,<br>0.5(C6 F4 I2) |
| Sum formula     | C16 H19 Br Co F2 I N5 O5              | C16 H19 Br Co F2 I N5 O5              |
| Mr              | 665.09                                | 665.10                                |
| Dx,g cm-3       | 1.960                                 | 1.960                                 |
| Z               | 4                                     | 4                                     |
| Mu (mm-1)       | 3.957                                 | 3.957                                 |
| F000            | 1292.0                                | 1292.0                                |
| F000'           | 1290.95                               |                                       |
| h,k,lmax        | 9,26,14                               | 9,26,14                               |
| Nref            | 3965                                  | 3937                                  |
| Tmin,Tmax       | 0.233,0.317                           | 0.653,1.000                           |
| Tmin'           | 0.196                                 |                                       |

Correction method= # Reported T Limits: Tmin=0.653 Tmax=1.000  
AbsCorr = MULTI-SCAN

Data completeness= 0.993      Theta(max)= 25.000

R(reflections)= 0.0506( 2561)      wR2(reflections)= 0.1231( 3937)

S = 0.969      Npar= 280

---



The following ALERTS were generated. Each ALERT has the format  
**test-name\_ALERT\_alert-type\_alert-level**.  
Click on the hyperlinks for more details of the test.



### Alert level B

PLAT910\_ALERT\_3\_B Missing # of FCF Reflection(s) Below Theta(Min).

26 Note

**Author Response: These reflections either have masked by the beamstop or have too high intensity (overflow), hence they have not been measured.**



### Alert level C

|                   |                                                 |        |              |
|-------------------|-------------------------------------------------|--------|--------------|
| PLAT334_ALERT_2_C | Small Aver. Benzene C-C Dist C14                | -C16_a | 1.37 Ang.    |
| PLAT342_ALERT_3_C | Low Bond Precision on C-C Bonds .....           |        | 0.01046 Ang. |
| PLAT906_ALERT_3_C | Large K Value in the Analysis of Variance ..... |        | 2.211 Check  |
| PLAT911_ALERT_3_C | Missing FCF Refl Between Thmin & STh/L=         | 0.595  | 2 Report     |

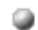

### Alert level G

|                   |                                                  |       |             |
|-------------------|--------------------------------------------------|-------|-------------|
| PLAT007_ALERT_5_G | Number of Unrefined Donor-H Atoms .....          |       | 3 Report    |
| PLAT380_ALERT_4_G | Incorrectly? Oriented X(sp2)-Methyl Moiety ..... |       | C1 Check    |
| PLAT380_ALERT_4_G | Incorrectly? Oriented X(sp2)-Methyl Moiety ..... |       | C4 Check    |
| PLAT380_ALERT_4_G | Incorrectly? Oriented X(sp2)-Methyl Moiety ..... |       | C5 Check    |
| PLAT380_ALERT_4_G | Incorrectly? Oriented X(sp2)-Methyl Moiety ..... |       | C8 Check    |
| PLAT431_ALERT_2_G | Short Inter HL..A Contact I1 ..04                |       | 2.94 Ang.   |
|                   | 1/2+x,1/2-y,-1/2+z =                             | 4_665 | Check       |
| PLAT883_ALERT_1_G | No Info/Value for _atom_sites_solution_primary   |       | Please Do ! |
| PLAT909_ALERT_3_G | Percentage of I>2sig(I) Data at Theta(Max) Still |       | 37% Note    |
| PLAT933_ALERT_2_G | Number of OMIT Records in Embedded .res File ... |       | 7 Note      |
| PLAT941_ALERT_3_G | Average HKL Measurement Multiplicity .....       |       | 3.3 Low     |
| PLAT978_ALERT_2_G | Number C-C Bonds with Positive Residual Density. |       | 0 Info      |

- 0 **ALERT level A** = Most likely a serious problem - resolve or explain  
1 **ALERT level B** = A potentially serious problem, consider carefully  
4 **ALERT level C** = Check. Ensure it is not caused by an omission or oversight  
11 **ALERT level G** = General information/check it is not something unexpected
- 1 ALERT type 1 CIF construction/syntax error, inconsistent or missing data  
4 ALERT type 2 Indicator that the structure model may be wrong or deficient  
6 ALERT type 3 Indicator that the structure quality may be low  
4 ALERT type 4 Improvement, methodology, query or suggestion  
1 ALERT type 5 Informative message, check



It is advisable to attempt to resolve as many as possible of the alerts in all categories. Often the minor alerts point to easily fixed oversights, errors and omissions in your CIF or refinement strategy, so attention to these fine details can be worthwhile. In order to resolve some of the more serious problems it may be necessary to carry out additional measurements or structure refinements. However, the purpose of your study may justify the reported deviations and the more serious of these should normally be commented upon in the discussion or experimental section of a paper or in the "special\_details" fields of the CIF. checkCIF was carefully designed to identify outliers and unusual parameters, but every test has its limitations and alerts that are not important in a particular case may appear. Conversely, the absence of alerts does not guarantee there are no aspects of the results needing attention. It is up to the individual to critically assess their own results and, if necessary, seek expert advice.

### **Publication of your CIF in IUCr journals**

A basic structural check has been run on your CIF. These basic checks will be run on all CIFs submitted for publication in IUCr journals (*Acta Crystallographica*, *Journal of Applied Crystallography*, *Journal of Synchrotron Radiation*); however, if you intend to submit to *Acta Crystallographica Section C* or *E* or *IUCrData*, you should make sure that full publication checks are run on the final version of your CIF prior to submission.

### **Publication of your CIF in other journals**

Please refer to the *Notes for Authors* of the relevant journal for any special instructions relating to CIF submission.



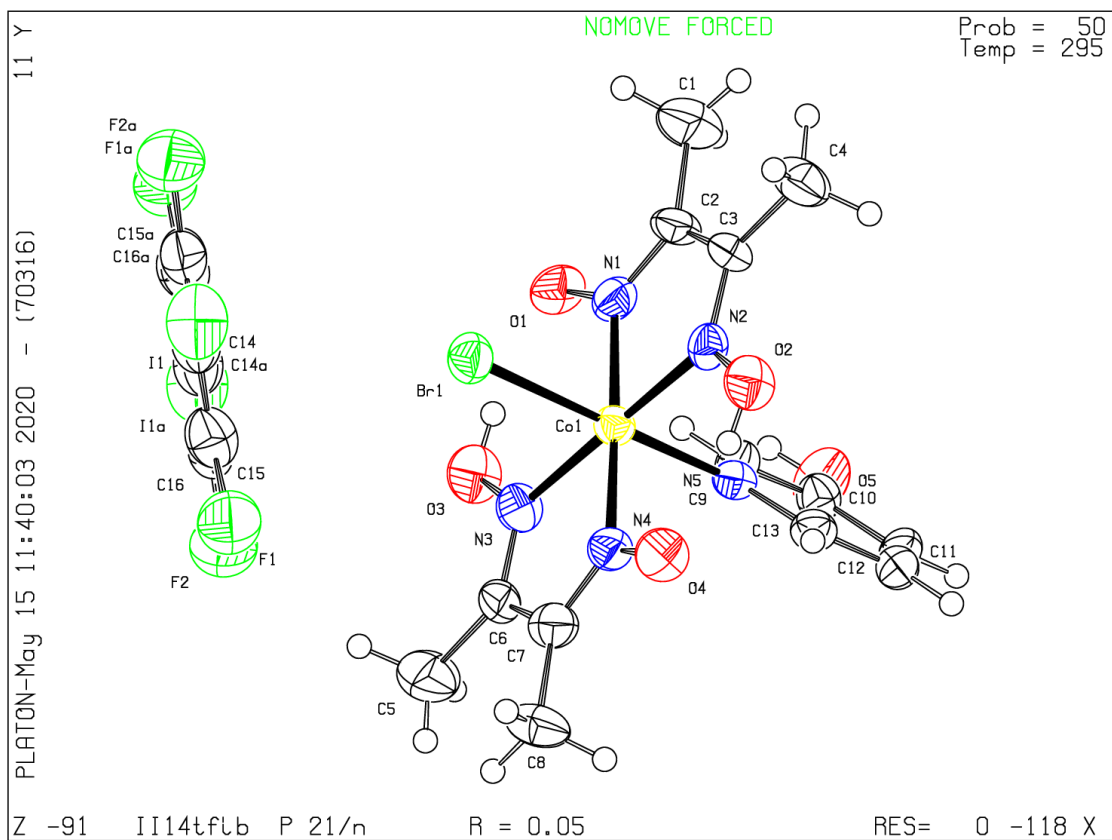



# checkCIF/PLATON report

Structure factors have been supplied for datablock(s) III14tfbb

THIS REPORT IS FOR GUIDANCE ONLY. IF USED AS PART OF A REVIEW PROCEDURE FOR PUBLICATION, IT SHOULD NOT REPLACE THE EXPERTISE OF AN EXPERIENCED CRYSTALLOGRAPHIC REFEREE.

No syntax errors found.      CIF dictionary      Interpreting this report

## Datablock: III14tfbb

---

|                 |                                        |                                        |
|-----------------|----------------------------------------|----------------------------------------|
| Bond precision: | C-C = 0.0078 A                         | Wavelength=0.71073                     |
| Cell:           | a=8.9682(4)                            | b=18.2906(10)      c=26.5773(9)        |
|                 | alpha=90                               | beta=90      gamma=90                  |
| Temperature:    | 295 K                                  |                                        |
|                 | Calculated                             | Reported                               |
| Volume          | 4359.6(3)                              | 4359.6(3)                              |
| Space group     | P b c a                                | P b c a                                |
| Hall group      | -P 2ac 2ab                             | -P 2ac 2ab                             |
| Moiety formula  | C13 H19 Br Co N5 O5,<br>0.5(C6 Br2 F4) | C13 H19 Br Co N5 O5,<br>0.5(C6 Br2 F4) |
| Sum formula     | C16 H19 Br2 Co F2 N5 O5                | C32 H38 Br4 Co2 F4 N10 O10             |
| Mr              | 618.09                                 | 1236.22                                |
| Dx,g cm-3       | 1.883                                  | 1.883                                  |
| Z               | 8                                      | 4                                      |
| Mu (mm-1)       | 4.509                                  | 4.509                                  |
| F000            | 2440.0                                 | 2440.0                                 |
| F000'           | 2439.43                                |                                        |
| h,k,lmax        | 11,23,33                               | 11,23,33                               |
| Nref            | 4761                                   | 4587                                   |
| Tmin,Tmax       | 0.115,0.157                            | 0.397,1.000                            |
| Tmin'           | 0.087                                  |                                        |

Correction method= # Reported T Limits: Tmin=0.397 Tmax=1.000  
AbsCorr = MULTI-SCAN

Data completeness= 0.963      Theta(max)= 26.998

R(reflections)= 0.0535( 2478)      wR2(reflections)= 0.1102( 4587)

S = 0.904      Npar= 284

---



The following ALERTS were generated. Each ALERT has the format

**test-name\_ALERT\_alert-type\_alert-level.**

Click on the hyperlinks for more details of the test.



### Alert level B

PLAT910\_ALERT\_3\_B Missing # of FCF Reflection(s) Below Theta(Min).

12 Note

**Author Response: These reflections either have masked by the beamstop or have too high intensity (overflow), hence they have not been measured.**



### Alert level C

PLAT334\_ALERT\_2\_C Small Aver. Benzene C-C Dist C14 -C16\_a 1.37 Ang.  
PLAT341\_ALERT\_3\_C Low Bond Precision on C-C Bonds ..... 0.00785 Ang.  
PLAT431\_ALERT\_2\_C Short Inter HL..A Contact Br2 ..04 . 3.08 Ang.  
1/2+x,1/2-y,2-z = 3\_557 Check  
PLAT906\_ALERT\_3\_C Large K Value in the Analysis of Variance ..... 25.860 Check  
PLAT906\_ALERT\_3\_C Large K Value in the Analysis of Variance ..... 5.124 Check  
PLAT906\_ALERT\_3\_C Large K Value in the Analysis of Variance ..... 2.117 Check  
PLAT911\_ALERT\_3\_C Missing FCF Refl Between Thmin & STh/L= 0.600 66 Report

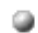

### Alert level G

FORMU01\_ALERT\_1\_G There is a discrepancy between the atom counts in the  
\_chemical\_formula\_sum and \_chemical\_formula\_moiety. This is  
usually due to the moiety formula being in the wrong format.  
Atom count from \_chemical\_formula\_sum: C32 H38 Br4 Co2 F4 N10 O10  
Atom count from \_chemical\_formula\_moiety:C16 H19 Br2 Co1 F2 N5 O5  
PLAT007\_ALERT\_5\_G Number of Unrefined Donor-H Atoms ..... 3 Report  
PLAT045\_ALERT\_1\_G Calculated and Reported Z Differ by a Factor ... 2.00 Check  
PLAT883\_ALERT\_1\_G No Info/Value for \_atom\_sites\_solution\_primary . Please Do !  
PLAT912\_ALERT\_4\_G Missing # of FCF Reflections Above STh/L= 0.600 96 Note  
PLAT941\_ALERT\_3\_G Average HKL Measurement Multiplicity ..... 3.1 Low  
PLAT978\_ALERT\_2\_G Number C-C Bonds with Positive Residual Density. 0 Info

- 0 **ALERT level A** = Most likely a serious problem - resolve or explain  
1 **ALERT level B** = A potentially serious problem, consider carefully  
7 **ALERT level C** = Check. Ensure it is not caused by an omission or oversight  
7 **ALERT level G** = General information/check it is not something unexpected

- 3 ALERT type 1 CIF construction/syntax error, inconsistent or missing data  
3 ALERT type 2 Indicator that the structure model may be wrong or deficient  
7 ALERT type 3 Indicator that the structure quality may be low  
1 ALERT type 4 Improvement, methodology, query or suggestion  
1 ALERT type 5 Informative message, check



It is advisable to attempt to resolve as many as possible of the alerts in all categories. Often the minor alerts point to easily fixed oversights, errors and omissions in your CIF or refinement strategy, so attention to these fine details can be worthwhile. In order to resolve some of the more serious problems it may be necessary to carry out additional measurements or structure refinements. However, the purpose of your study may justify the reported deviations and the more serious of these should normally be commented upon in the discussion or experimental section of a paper or in the "special\_details" fields of the CIF. checkCIF was carefully designed to identify outliers and unusual parameters, but every test has its limitations and alerts that are not important in a particular case may appear. Conversely, the absence of alerts does not guarantee there are no aspects of the results needing attention. It is up to the individual to critically assess their own results and, if necessary, seek expert advice.

### **Publication of your CIF in IUCr journals**

A basic structural check has been run on your CIF. These basic checks will be run on all CIFs submitted for publication in IUCr journals (*Acta Crystallographica*, *Journal of Applied Crystallography*, *Journal of Synchrotron Radiation*); however, if you intend to submit to *Acta Crystallographica Section C* or *E* or *IUCrData*, you should make sure that full publication checks are run on the final version of your CIF prior to submission.

### **Publication of your CIF in other journals**

Please refer to the *Notes for Authors* of the relevant journal for any special instructions relating to CIF submission.



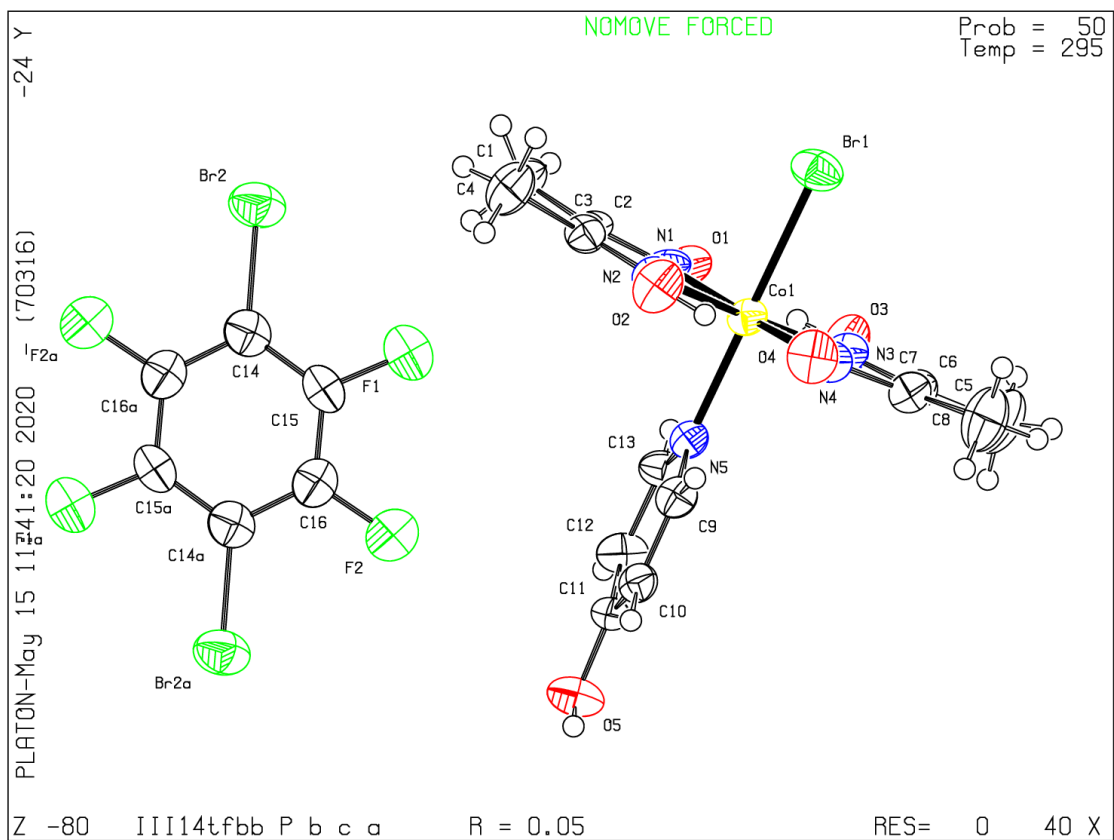



# checkCIF/PLATON report

Structure factors have been supplied for datablock(s) III14tfib

THIS REPORT IS FOR GUIDANCE ONLY. IF USED AS PART OF A REVIEW PROCEDURE FOR PUBLICATION, IT SHOULD NOT REPLACE THE EXPERTISE OF AN EXPERIENCED CRYSTALLOGRAPHIC REFEREE.

No syntax errors found.      CIF dictionary      Interpreting this report

## Datablock: III14tfib

---

|                 |                               |                               |             |
|-----------------|-------------------------------|-------------------------------|-------------|
| Bond precision: | C-C = 0.0093 A                | Wavelength=0.71073            |             |
| Cell:           | a=10.7618(9)                  | b=8.8634(6)                   | c=28.628(6) |
|                 | alpha=90                      | beta=90.506(11)               | gamma=90    |
| Temperature:    | 295 K                         |                               |             |
|                 | Calculated                    | Reported                      |             |
| Volume          | 2730.6(6)                     | 2730.6(6)                     |             |
| Space group     | P 21/n                        | P 21/n                        |             |
| Hall group      | -P 2yn                        | -P 2yn                        |             |
| Moiety formula  | C13 H19 Br Co N5 O5, C6 F4 I2 | C13 H19 Br Co N5 O5, C6 F4 I2 |             |
| Sum formula     | C19 H19 Br Co F4 I2 N5 O5     | C19 H19 Br Co F4 I2 N5 O5     |             |
| Mr              | 866.02                        | 866.03                        |             |
| Dx,g cm-3       | 2.107                         | 2.107                         |             |
| Z               | 4                             | 4                             |             |
| Mu (mm-1)       | 4.419                         | 4.419                         |             |
| F000            | 1648.0                        | 1648.0                        |             |
| F000'           | 1645.29                       |                               |             |
| h,k,lmax        | 12,10,34                      | 12,10,34                      |             |
| Nref            | 4815                          | 4517                          |             |
| Tmin,Tmax       | 0.126,0.137                   | 0.571,1.000                   |             |
| Tmin'           | 0.080                         |                               |             |

Correction method= # Reported T Limits: Tmin=0.571 Tmax=1.000  
AbsCorr = MULTI-SCAN

Data completeness= 0.938      Theta(max)= 24.997

R(reflections)= 0.0350( 2294)      wR2(reflections)= 0.0627( 4517)

S = 0.722      Npar= 338

---



The following ALERTS were generated. Each ALERT has the format

**test-name\_ALERT\_alert-type\_alert-level.**

Click on the hyperlinks for more details of the test.



### Alert level B

PLAT910\_ALERT\_3\_B Missing # of FCF Reflection(s) Below Theta(Min).

14 Note

**Author Response: These reflections either have masked by the beamstop  
or have too high intensity (overflow), hence they have not been measured.**

---

PLAT911\_ALERT\_3\_B Missing FCF Refl Between Thmin & STh/L= 0.595

284 Report



### Alert level C

GOODF01\_ALERT\_2\_C The least squares goodness of fit parameter lies  
outside the range 0.80 <> 2.00

Goodness of fit given = 0.722

PLAT029\_ALERT\_3\_C \_diffn\_measured\_fraction\_theta\_full value Low . 0.968 Why?

PLAT242\_ALERT\_2\_C Low 'MainMol' Ueq as Compared to Neighbors of C17 Check

PLAT334\_ALERT\_2\_C Small Aver. Benzene C-C Dist C14 -C19 1.37 Ang.

PLAT342\_ALERT\_3\_C Low Bond Precision on C-C Bonds ..... 0.00931 Ang.

PLAT417\_ALERT\_2\_C Short Inter D-H..H-D H4 ..H5 . 2.14 Ang.

x,1+y,z = 1\_565 Check

PLAT790\_ALERT\_4\_C Centre of Gravity not Within Unit Cell: Resd. # 1 Note

C13 H19 Br Co N5 O5

PLAT906\_ALERT\_3\_C Large K Value in the Analysis of Variance ..... 3.546 Check

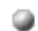

### Alert level G

PLAT007\_ALERT\_5\_G Number of Unrefined Donor-H Atoms ..... 3 Report

PLAT432\_ALERT\_2\_G Short Inter X...Y Contact O5 ..C18 2.93 Ang.

1+x,-1+y,z = 1\_645 Check

PLAT434\_ALERT\_2\_G Short Inter HL..HL Contact I1 ..Br1 3.42 Ang.

2-x,2-y,-z = 3\_775 Check

PLAT883\_ALERT\_1\_G No Info/Value for \_atom\_sites\_solution\_primary . Please Do !

PLAT941\_ALERT\_3\_G Average HKL Measurement Multiplicity ..... 3.6 Low

PLAT978\_ALERT\_2\_G Number C-C Bonds with Positive Residual Density. 0 Info

- 
- 0 **ALERT level A** = Most likely a serious problem - resolve or explain  
2 **ALERT level B** = A potentially serious problem, consider carefully  
8 **ALERT level C** = Check. Ensure it is not caused by an omission or oversight  
6 **ALERT level G** = General information/check it is not something unexpected

- 1 ALERT type 1 CIF construction/syntax error, inconsistent or missing data  
7 ALERT type 2 Indicator that the structure model may be wrong or deficient  
6 ALERT type 3 Indicator that the structure quality may be low  
1 ALERT type 4 Improvement, methodology, query or suggestion  
1 ALERT type 5 Informative message, check
- 
-



It is advisable to attempt to resolve as many as possible of the alerts in all categories. Often the minor alerts point to easily fixed oversights, errors and omissions in your CIF or refinement strategy, so attention to these fine details can be worthwhile. In order to resolve some of the more serious problems it may be necessary to carry out additional measurements or structure refinements. However, the purpose of your study may justify the reported deviations and the more serious of these should normally be commented upon in the discussion or experimental section of a paper or in the "special\_details" fields of the CIF. checkCIF was carefully designed to identify outliers and unusual parameters, but every test has its limitations and alerts that are not important in a particular case may appear. Conversely, the absence of alerts does not guarantee there are no aspects of the results needing attention. It is up to the individual to critically assess their own results and, if necessary, seek expert advice.

### **Publication of your CIF in IUCr journals**

A basic structural check has been run on your CIF. These basic checks will be run on all CIFs submitted for publication in IUCr journals (*Acta Crystallographica*, *Journal of Applied Crystallography*, *Journal of Synchrotron Radiation*); however, if you intend to submit to *Acta Crystallographica Section C* or *E* or *IUCrData*, you should make sure that full publication checks are run on the final version of your CIF prior to submission.

### **Publication of your CIF in other journals**

Please refer to the *Notes for Authors* of the relevant journal for any special instructions relating to CIF submission.



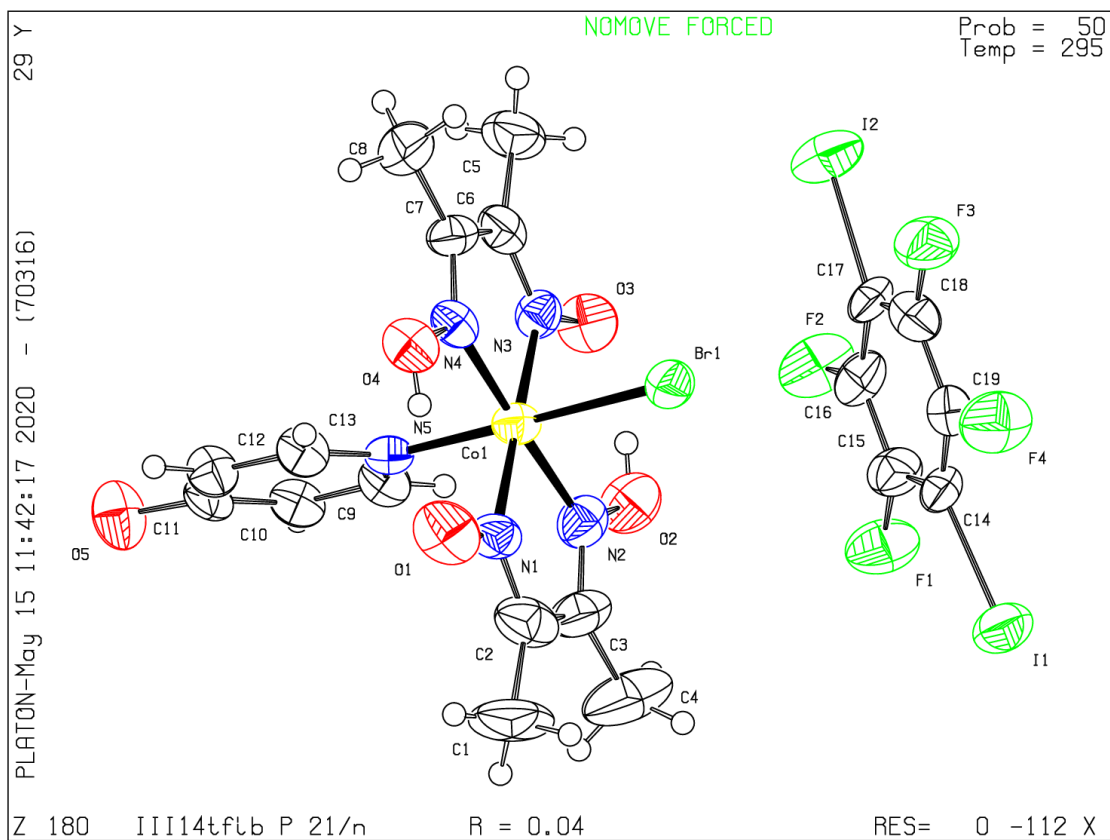

Supplement: s1 [file s1]
